# Supplementary figures and images for: Exercise therapy with or without other physical therapy interventions versus placebo interventions for osteoarthritis –Systematic review
Source: PubMed Central journal article supplement — Osteoarthr Cartil Open. 2021 Jul 22;3(3):100195. doi: 10.1016/j.ocarto.2021.100195 (PMC9718284; doi:10.1016/j.ocarto.2021.100195), 2021-07-22

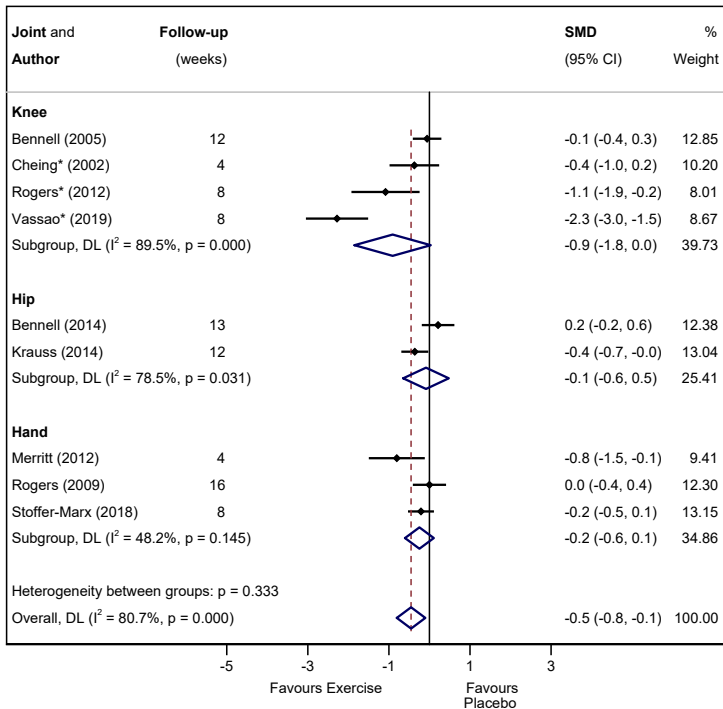

Supplement: mmc4.pdf [file mmc4.pdf]

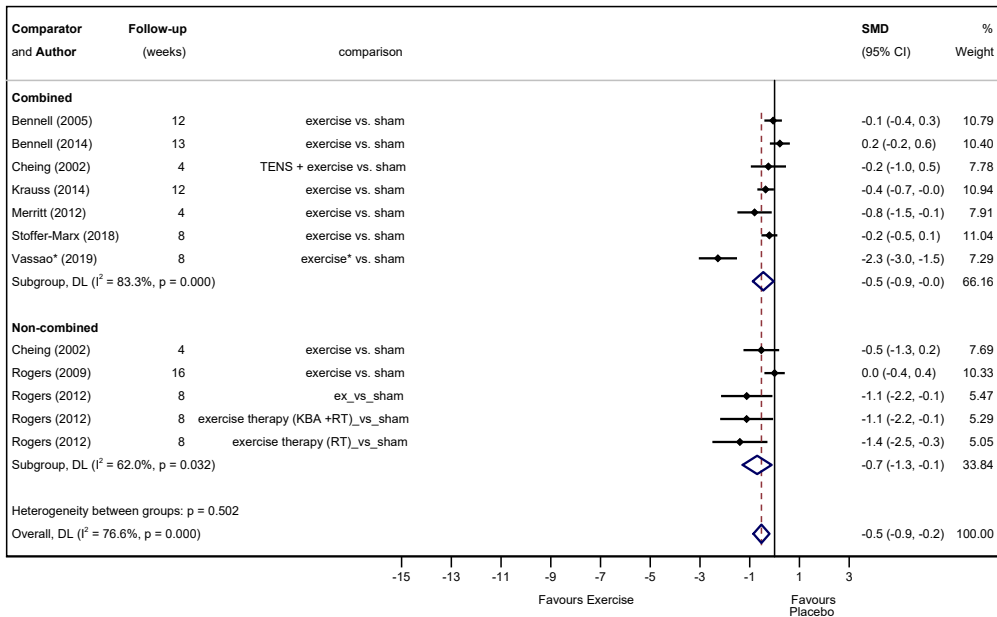

Supplement: mmc5.pdf [file mmc5.pdf]

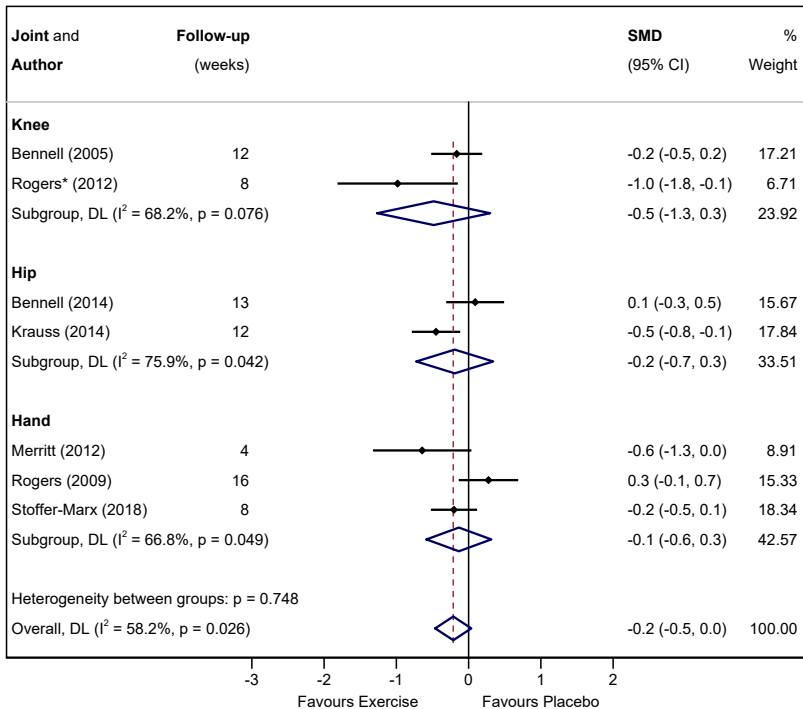

Supplement: mmc6.pdf [file mmc6.pdf]

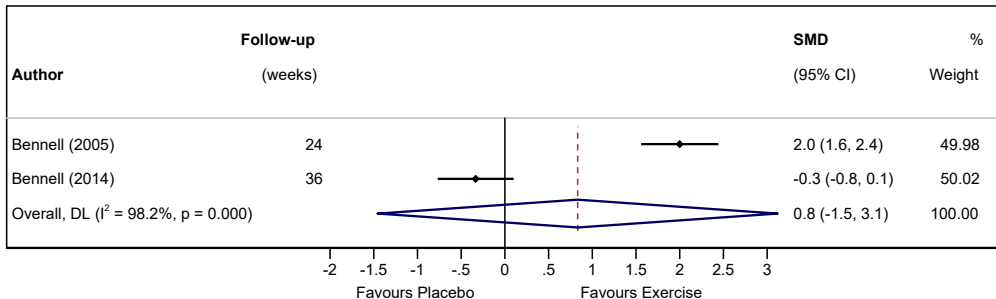

Supplement: mmc8.pdf [file mmc8.pdf]
